# Supplementary material
Source: PubMed Central journal article supplement (PMC7616686)

**Supplementary Figure 1.** Individual serotypes in children with IPD <5 years, Mahosot Hospital, Vientiane, 2004-2019 (n=20). Vaccine serotypes shown in solid colors.

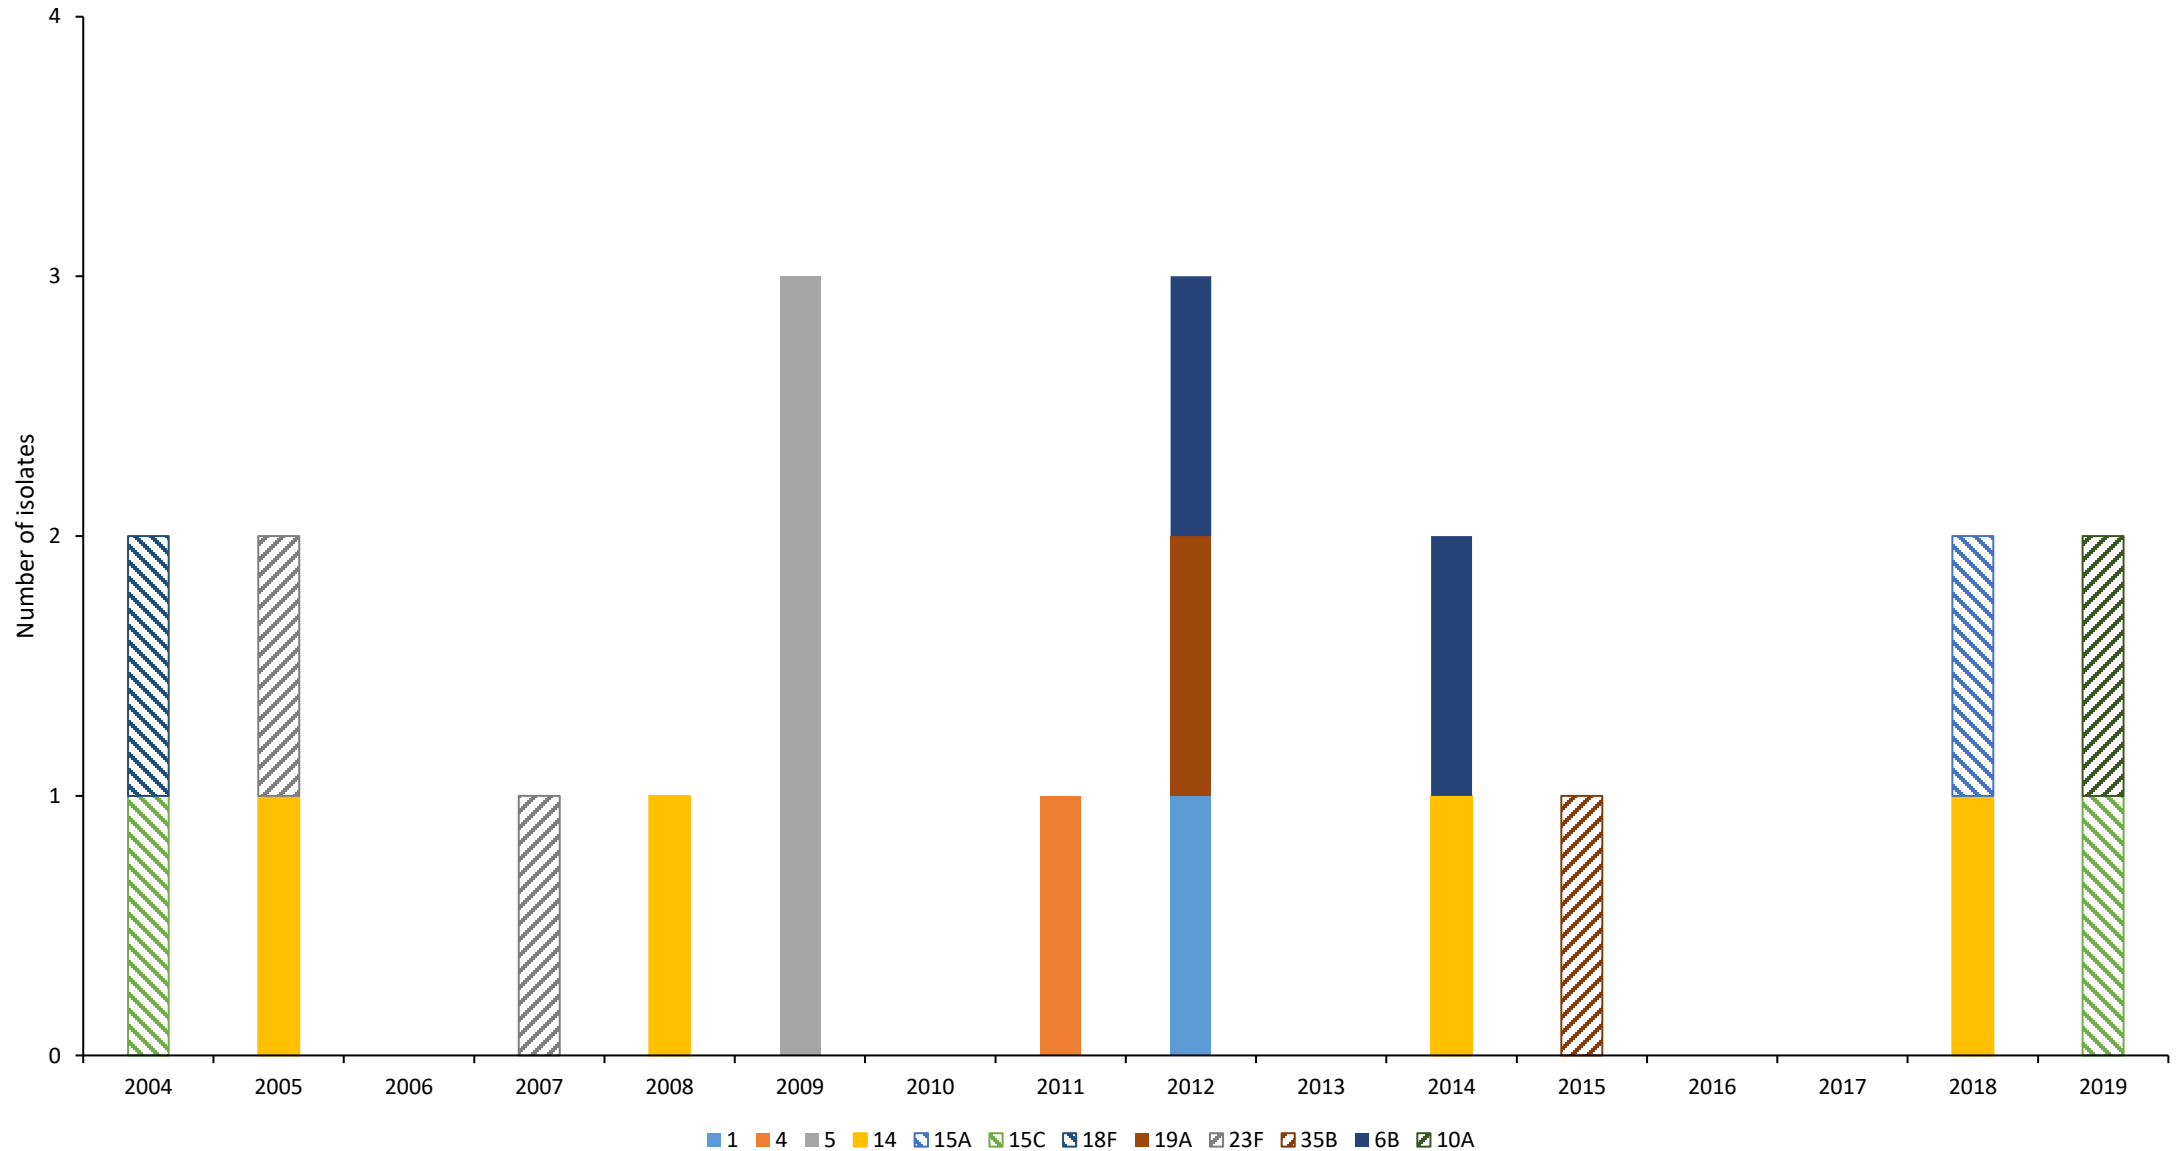

Supplement: EMS199117-supplement-Supplementary_Figure_1.pdf [file EMS199117-supplement-Supplementary_Figure_1.pdf]
