# Supplementary material
Source: PubMed Central journal article supplement (PMC7616686)

**Supplementary Figure 3.** Percentages of all hospitalizations of children aged 2-59 months for other “control” conditions compared with pneumonia in three central hospitals in Vientiane, 2011-2013

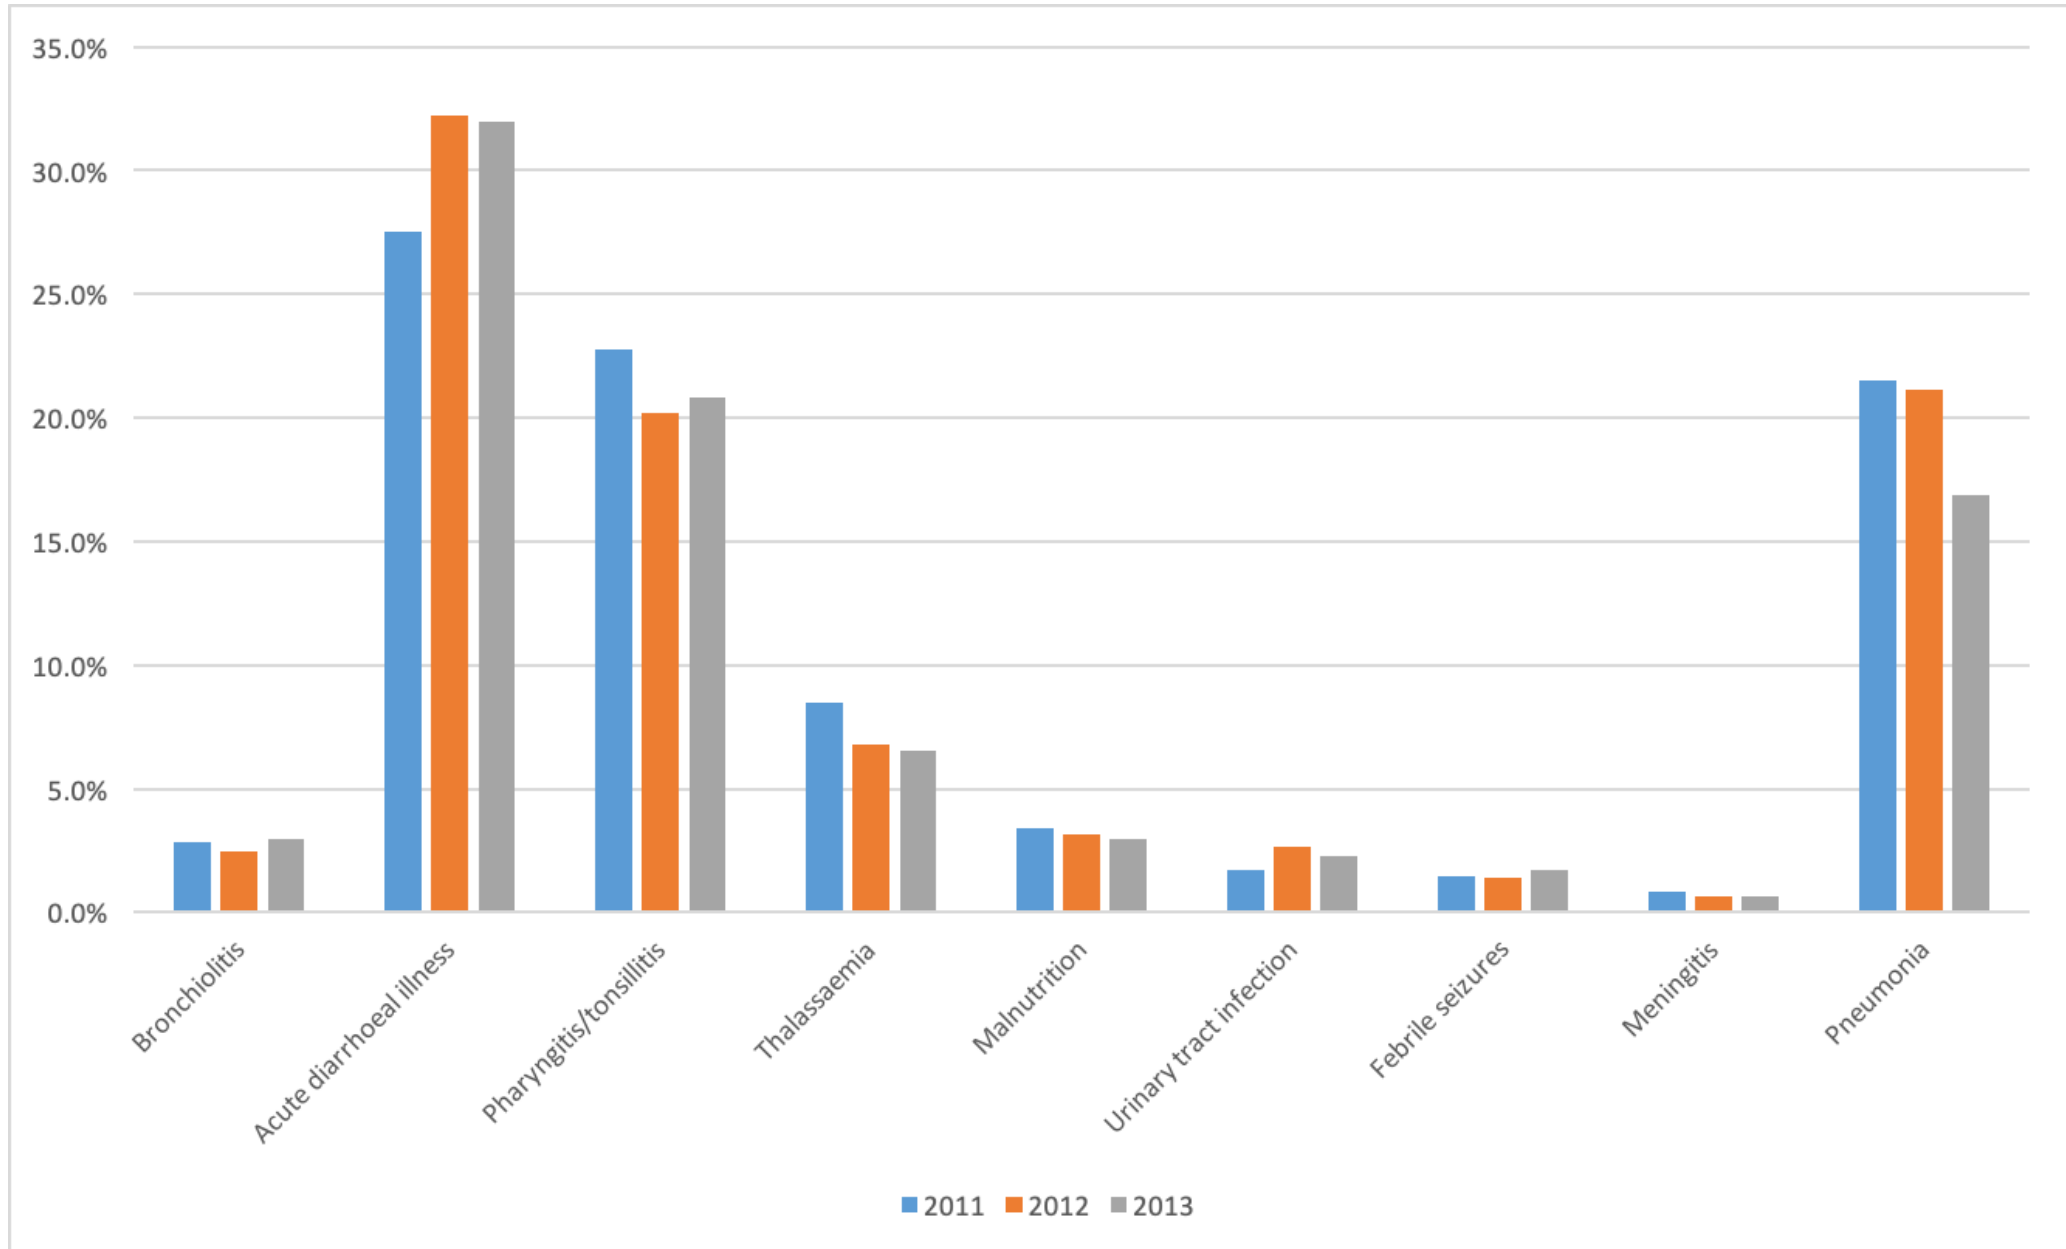

Supplement: EMS199117-supplement-Supplementary_Figure_3.pdf [file EMS199117-supplement-Supplementary_Figure_3.pdf]
