# Supplementary material
Source: PubMed Central journal article supplement (PMC7616686)
Supplement: EMS199117-supplement-Supplementary_Figure_4.pdf [file EMS199117-supplement-Supplementary_Figure_4.pdf]

**Supplementary Figure 4.** Flowchart of medical record ascertainment for pneumonia admissions in central hospitals, Vientiane Capital

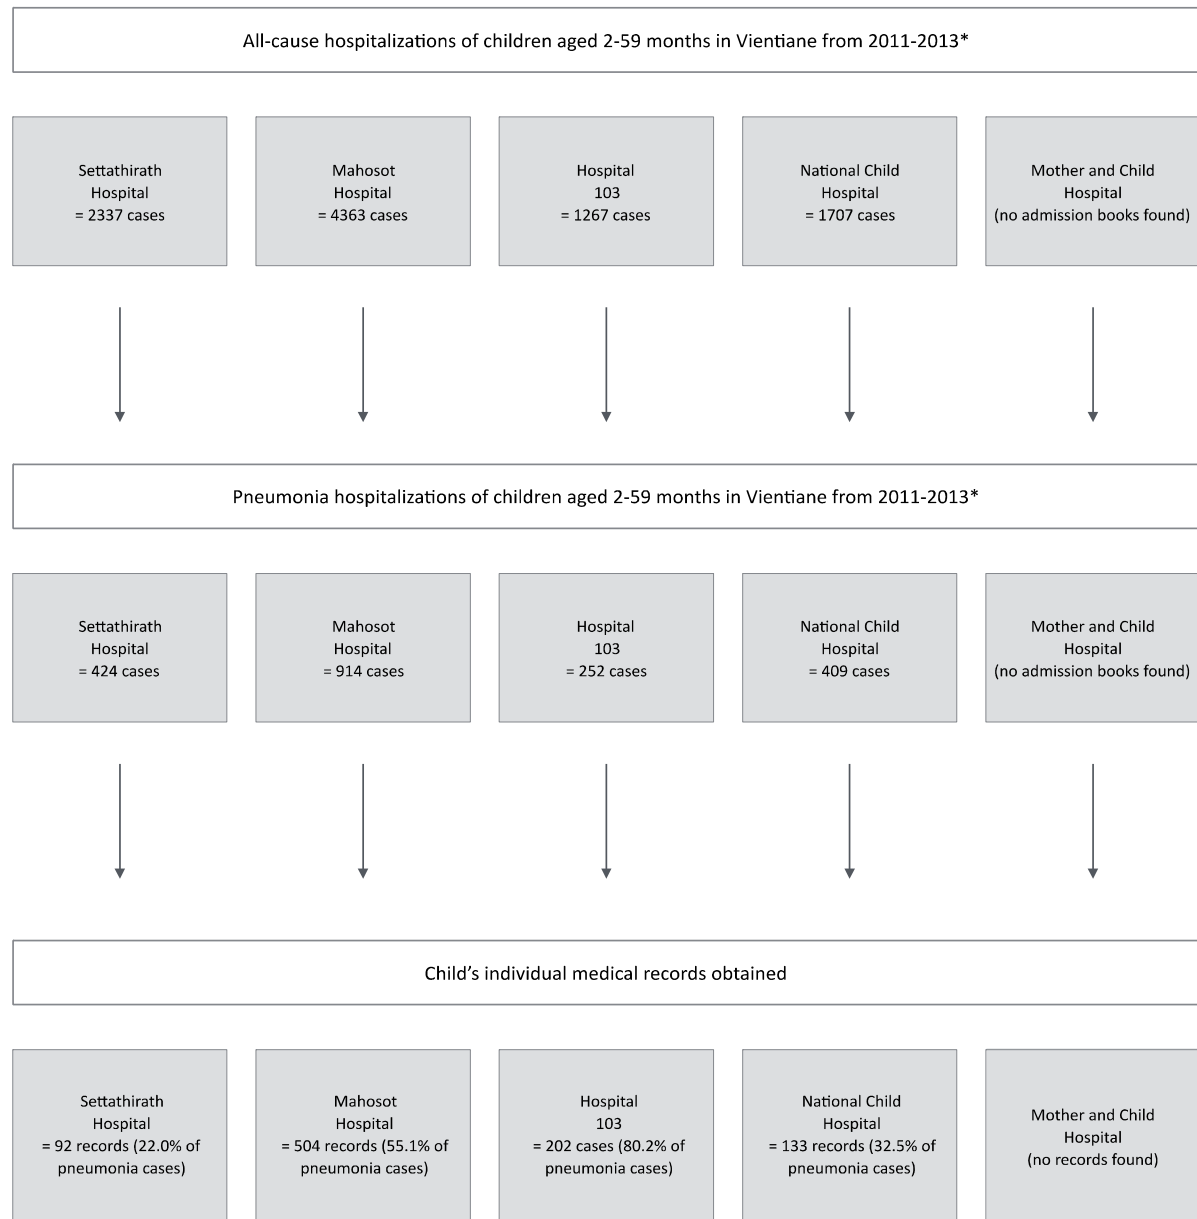

\*from admission books
